# Supplementary material
Source: publisher figshare collection journal article supplement (https://tandf.figshare.com/ndownloader/files/19016294)
Supplement: Supplementary file 1 [file 19016294]

## Sheet: Sheet1
Appendix table: orthotic prescription details by diagnosis and patient functional scores and rehabilitation complexity scores at admission / discharge
Subject	Diagnosis	Orthosis / orthoses	Orthosis specification	Shape capture and rectification for custom orthoses	Rehab Complexity Scale (RCS)*	RCS admission	RCS discharge	Total FIM-FAM admission	Total FIM-FAM discharge	FIMFAM transfers admission	FIMFAM transfers discharge	FIMFAM walking at admission	FIMFAM walking at discharge	FIMFAM stairs at admission	FIMFAM stairs at discharge	Neurological Impairment Set (NIS) at admission	Neurological Impairment Set (NIS) at discharge	Patient Categorisation Tool (PCAT)
1	Stroke	Unilateral custom rigid AFO	Custom rigid AFO. Angle of ankle 90 degrees/plantigrade. 4mm homopolymer polypropylene. 0.09" Carbon ankle reinforcements (Compcore, Becker). Return pull, backed, padded, leather ankle and calf straps. 3mm grey poron ankle padding.	Plaster of paris hand cast. Manually rectified by technician.	233332 (16) = 133442 (17)	16	17	223	273	3	7	2	6	1	6	26	14	35
2	Stroke	Unilateral custom rigid AFO	Custom rigid AFO. Angle of ankle 90 degrees/plantigrade. 4.5mm homopolymer polypropylene. 0.09" Carbon ankle reinforcements (Compcore, Becker). Return pull, backed, padded, leather ankle and calf straps. 3mm grey poron ankle padding. AFO-FC SVA = 12 degrees incline.	Plaster of paris hand cast. Manually rectified by technician.	222342 (15) = 122442 (15)	15	15	164	271	4	6	2	5	1	1	12	19	33
3	Stroke	Unilateral custom rigid AFO	Custom rigid AFO. Angle of ankle 90 degrees/plantigrade. 4.5mm homopolymer polypropylene. 0.09" Carbon ankle reinforcements (Compcore, Becker). Return pull, backed, padded, leather ankle and calf straps. 3mm grey poron ankle padding. AFO-FC SVA = 10 degrees incline.	Plaster of paris hand cast. Manually rectified by technician.	222320 (11) = 122432 (14)	11	14	201	299	4	6	1	6	1	5	16	12	29
4	Stroke	Unilateral custom rigid AFO	Custom rigid AFO. Angle of ankle 90 degrees/plantigrade. 4.5mm homopolymer polypropylene. 0.09" Carbon ankle reinforcements (Compcore, Becker). Return pull, backed, padded, leather ankle and calf straps. 3mm grey poron ankle padding.	Synethetic hand cast. Digitally rectified using 3D scan of cast by clinician.	232321 (13) = 233432 (17)	13	17	101	148	2	4	1	2	1	1	27	23	35
5	Stroke	Unilateral custom rigid AFO	Custom rigid AFO. Angle of ankle 90 degrees/plantigrade. 4.5mm homopolymer polypropylene. 0.09" Carbon ankle reinforcements (Compcore, Becker). Return pull, backed, padded, leather ankle and calf straps. 3mm grey poron ankle padding. AFO-FC SVA = 12 degrees incline.	Plaster of paris hand cast. Manually rectified by technician.	222331 (13) = 112331 (11)	13	11	139	165	3	6	1	2	1	1	16	13	33
6	Stroke	Unilateral custom hinged AFO	Custom hinged AFO. Angle of ankle 90 degrees/plantigrade. 4.5mm homopolymer polypropylene. Ankle hinges with plantarflexion stops (Tamarack, Becker). Return pull, backed, padded, leather ankle and calf straps. 3mm grey poron ankle padding.	Plaster of paris hand cast. Manually rectified by technician.	222332 (14) = 112332 (12)	14	12	218	298	6	6	5	6	1	6	12	12	33
7	Stroke	Unilateral custom hinged AFO	Custom hinged AFO. Angle of ankle 90 degrees/plantigrade. 4.5mm homopolymer polypropylene. Ankle hinges with plantarflexion stops (Tamarack, Becker). Return pull, backed, padded, leather ankle and calf straps. 3mm grey poron ankle padding. AFO-FC SVA = 14 degrees incline.	Plaster of paris hand cast. Manually rectified by technician.	122432 (14) = 122332 (13)	14	13	174	211	5	7	2	6	1	6	11	9	32
8	Stroke	Unilateral pre-fabricated AFO	Helix AFO (Orthotic Composites / Thuasne)	Plaster of paris hand cast. Manually rectified by technician.	133342 (16) = 122332 (13)	16	13	225	Not recorded	4	Not recorded	1	Not recorded	1	Not recorded	11	Not recorded	24
9	Stroke	Unilateral pre-fabricated AFO	Dyna Ankle AFO (Otto Bock)	Plaster of paris hand cast. Manually rectified by technician.	122221 (10) = 122221 (10)	10	10	204	312	6	7	5	6	1	6	18	9	34
10	Stroke	Unilateral custom KAFO	Custom rigid KAFO. Angle of ankle 90 degrees/plantigrade. Angle of knee 5 degrees flexion. 4.5mm homopolymer polypropylene. Locked knee joints - Bale design. 0.09" Carbon ankle reinforcements (Compcore, Becker). Return pull, backed, padded, leather ankle, calf and thigh straps. 3mm grey poron ankle padding.	Plaster of paris hand cast. Manually rectified by technician.	122332 (13) = 233432 (17)	13	17	162	214	2	6	1	2	1	1	18	15	33
11	Incomplete spinal cord injury	Unilateral custom KAFO	Custom KAFO. Angle of ankle 90 degrees/plantigrade. Angle of knee 7 degrees flexion. 4.5mm homopolymer polypropylene. Locked knee joints - Bale design. Ankle joints with plantarflexion stops (17M2, Otto Bock). Return pull, backed, padded, leather ankle, calf and thigh straps. 3mm grey poron ankle padding.	Plaster of paris hand cast. Manually rectified by technician.	132331 (13) = 112332 (12)	13	12	186	210	6	6	1	5	1	6	10	10	30
12	Incomplete spinal cord injury	Unilateral custom KAFO	Custom KAFO. Angle of ankle 90 degrees/plantigrade. Angle of knee 7 degrees flexion. 4.5mm homopolymer polypropylene. Locked knee joints - Bale design. Removable top section (Quick release joints, Becker). Rigid ankle design. 0.09" Carbon ankle reinforcements (Compcore, Becker). Return pull, backed, padded, leather ankle, calf and thigh straps. 3mm grey poron ankle padding.	Plaster of paris hand cast. Manually rectified by technician.	232221 (12) = 132332 (14)	12	14	263	287	6	6	1	2	1	1	13	14	29
13	Incomplete spinal cord injury	Bilateral custom rigid AFOs	Custom rigid AFOs. Angle of ankle 90 degrees/plantigrade. 4.5mm homopolymer polypropylene. 0.09" Carbon ankle reinforcements (Compcore, Becker). Return pull, backed, padded, leather ankle and calf straps. 3mm grey poron ankle padding. AFO-FC SVA = 11 degrees incline.	Plaster of paris hand cast. Manually rectified by technician.	232221 (12) = 232232 (14)	12	14	138	166	3	4	1	1	1	1	15	12	29
14	Incomplete spinal cord injury	Bilateral custom rigid AFOs	Custom rigid AFO. Angle of ankle 90 degrees/plantigrade. 4.5mm homopolymer polypropylene. 0.09" Carbon ankle reinforcements (Compcore, Becker). Return pull, backed, padded, leather ankle and calf straps. 3mm grey poron ankle padding.	Plaster of paris hand cast. Manually rectified by technician.	232222 (13) = 132222 (12)	13	12	120	156	1	3	1	1	1	1	25	14	29
15	Incomplete spinal cord injury	Unilateral custom rigid AFO	Custom rigid AFO. Angle of ankle 90 degrees/plantigrade. 4mm homopolymer polypropylene. 0.09" Carbon ankle reinforcements (Compcore, Becker). Return pull, backed, padded, leather ankle and calf straps. 3mm grey poron ankle padding. AFO-FC SVA = 11 degrees incline.	Plaster of paris hand cast. Manually rectified by technician.	222221 (11) = 112332 (12)	11	12	154	184	5	5	2	2	1	1	11	11	30
16	Incomplete spinal cord injury	Custom foot orthoses	Ethylene-vinyl Acetate (70/50 Shore A) material. 3/4 length. 5 degree medial rearfoot posts.	Foam impression box. Scanned and digitally modelled by technician.	132221 (11) = 122332 (13)	11	13	148	210	5	7	1	6	1	1	11	7	28
17	Incomplete spinal cord injury	No prescription	NA	NA	233332 (16) = 222322 (13)	16	13	108	108	1	1	1	1	1	1	20	20	27
18	Peripheral neuropathy	Bilateral custom rigid AFOs	Custom rigid AFOs. Angle of ankle 90 degrees/plantigrade. 4.5mm homopolymer polypropylene. 0.09" Carbon ankle reinforcements (Compcore, Becker). Return pull, backed, padded, leather ankle and calf straps. 3mm grey poron ankle padding. incline.	Plaster of paris hand cast. Manually rectified by technician.	222232 (15) = 122432 (14)	15	14	210	270	3	5	1	1	1	1	20	16	Not recorded
19	Peripheral neuropathy	Bilateral custom hinged AFOs	Custom hinged AFOs. Angle of ankle 10 degrees plantarflexion. 4.5mm homopolymer polypropylene. Ankle hinges with plantarflexion stops (Tamarack, Becker). Return pull, backed, padded, leather ankle and calf straps. 3mm grey poron ankle padding.	Plaster of paris hand cast. Manually rectified by technician.	122332 (13) = 122332 (13)	13	13	180	222	3	6	1	6	1	6	10	7	30
20	Peripheral neuropathy	Orthotic / orthopaedic footwear	Modular footwear with 20mm heel raises and forefoot rocker soles.	Synethetic hand cast.	222221 (11) = 122221 (10)	11	10	209	253	3	5	1	5	1	1	13	11	27
21	Peripheral neuropathy	No prescription	NA	NA	222221 (11) = 122322 (12)	11	12	155	206	3	7	5	6	1	5	18	10	27
22	Brain injury	Unilateral custom rigid AFO	Custom rigid AFO. Angle of ankle 17.5 degrees plantarflexion. 4mm homopolymer polypropylene. 0.09" Carbon ankle reinforcements (Compcore, Becker). Return pull, backed, padded, leather ankle and calf straps. Ankle strap is lateral 'y-strap' design. 3mm grey poron ankle padding. AFO-FC SVA = 11 degrees incline.	Plaster of paris hand cast. Manually rectified by technician.	222342 (15) = 233442 (18)	15	18	200	249	5	6	1	4	1	1	20	19	32
23	Brain injury	Unilateral custom rigid AFO	Custom rigid AFO. Angle of ankle 90 degrees/plantigrade. 4.5mm homopolymer polypropylene. 0.09" Carbon ankle reinforcements (Compcore, Becker). Return pull, backed, padded, leather ankle and calf straps. 3mm grey poron ankle padding.	Plaster of paris hand cast. Manually rectified by technician.	223332 (15) = 112432 (13)	15	13	147	204	1	6	1	6	1	5	21	20	35
24	Multiple sclerosis	Custom foot orthoses	Ethylene-vinyl Acetate (70/50 Shore A) material. 3/4 length. 4 degree medial rearfoot posts.	Foam impression box. Scanned and digitally modelled by technician.	132222 (12) = 122322 (12)	12	12	205	214	7	7	6	6	6	6	9	7	25
25	Functional neurological disorder	Pre-fabricated foot orthoses	TRIO foot orthoses (Talarmade)	NA	123232 (13) = 022332 (12)	13	12	166	219	3	7	1	6	1	6	23	11	33
	*Illustrates individual domains with total score in brackets. Scores at admission and discharge are presented separated by '='
